# Supplementary material for: Targeting HIV Reservoir in Infected CD4 T Cells by Dual-Affinity Re-targeting Molecules (DARTs) that Bind HIV Envelope and Recruit Cytotoxic T Cells
Source: PubMed Central journal article supplement (PMC4634948; doi:10.1371/journal.ppat.1005233), 2015-11-05
Supplement: ppat.1005233.s004.pdf [file ppat.1005233.s004.pdf]

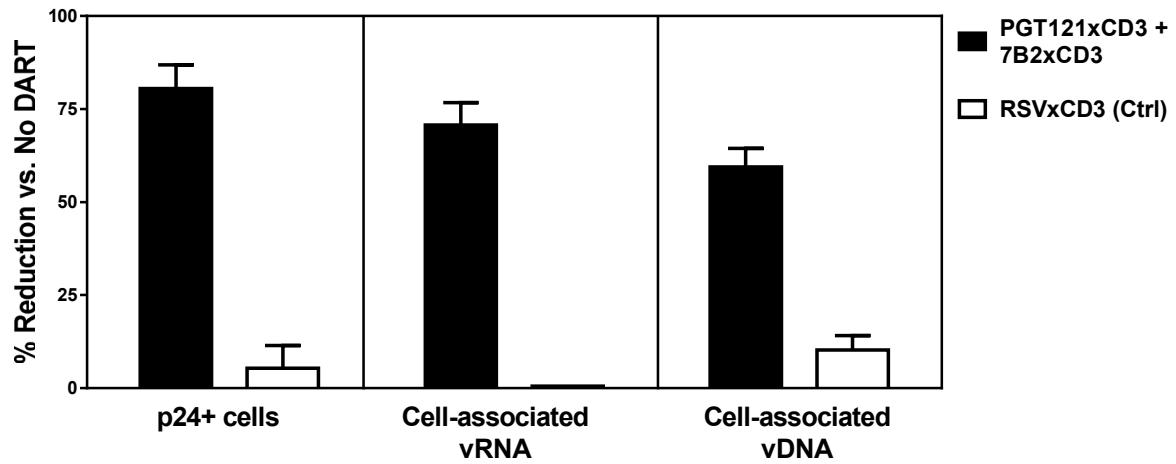

**Supplementary Fig. 4. HIVxCD3 DARTs reduce cell-associated HIV p24 protein, HIV RNA, and integrated HIV DNA.** PGT121xCD3 + 7B2xCD3 HIV DARTs (200 pM each) were added to unstimulated primary CD4 T cells 24 hours post spinfoction with HIV BaL. After 5 days of culture, cells were analyzed: by FACS for intracellular p24 protein expression, by qRT-PCR (COBAS) for vRNA, and by qPCR for total vDNA. The average of data from 2 donors are depicted.
