# Supplementary material for: Targeting HIV Reservoir in Infected CD4 T Cells by Dual-Affinity Re-targeting Molecules (DARTs) that Bind HIV Envelope and Recruit Cytotoxic T Cells
Source: PubMed Central journal article supplement (PMC4634948; doi:10.1371/journal.ppat.1005233), 2015-11-05
Supplement: ppat.1005233.s005.pdf [file ppat.1005233.s005.pdf]

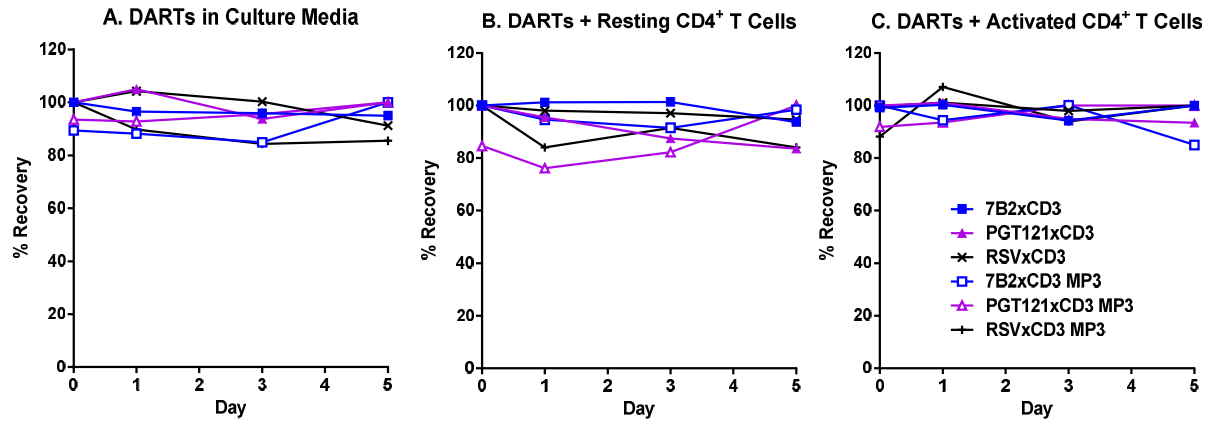

**Supplementary Fig. 5. Stability of HIVxCD3 DARTs in the presence of resting or activated CD4<sup>+</sup> T cells in vitro.** Selected HIVxCD3 DARTs in basic or MP3 format at a concentration of 50 ng/mL were incubated in (A) culture media (complete RPMI, 10% FCS, in (B) culture media plus  $1 \times 10^6$  CD4<sup>+</sup> T cells, or in (C) culture media,  $1 \times 10^6$  CD4<sup>+</sup> T cells, 50 ng/mL PMA and 500 ng/mL ionomycin for 5 days at 37°C. Samples were collected on the days indicated, and DART concentrations were measured by quantitative ELISA. % recovery on each day was determined compared to day 0.
