# Supplementary material for: Targeting HIV Reservoir in Infected CD4 T Cells by Dual-Affinity Re-targeting Molecules (DARTs) that Bind HIV Envelope and Recruit Cytotoxic T Cells
Source: PubMed Central journal article supplement (PMC4634948; doi:10.1371/journal.ppat.1005233), 2015-11-05
Supplement: ppat.1005233.s006.pdf [file ppat.1005233.s006.pdf]

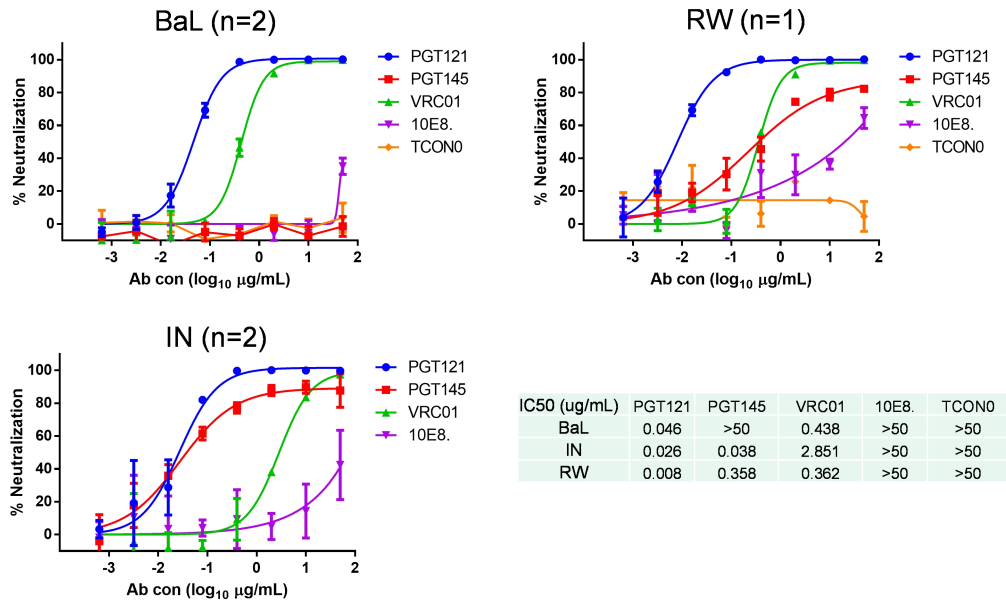

**Supplementary Fig. 6. Neutralization activity of parental anti-HIV Env IgGs.** The three HIV isolates indicated were pre-incubated with the bNAbs PGT121, PGT145, VRC01, or 10E8 prior to infection of CEM-CCR5 reporter cells using luciferase as a read-out in a standard single cycle neutralization assay. For HIV-1 BaL and RW strains, an isotype control Ab TCON0 was also included. The IC<sub>50</sub>s in µg/mL for each bNAb and HIV isolate are indicated. Representative results from a single donor are depicted.
